# Supplementary material for: Esketamine relieves postoperative depression and pain indicators in patients undergoing laparoscopic total hysterectomy
Source: Research Square preprint supplement (doi:10.21203/rs.3.rs-6395068/v1), 2025-05-09
Supplement: Supplementary file 2 [file 51578ba0173dda021b0979ac.xlsx]

## Sheet: Sheet1
trial_id	utrn	reg_name	date_registration	primary_sponsor	public_title	acronym	scientific_title	scientific_acronym	date_enrolment	type_enrolment	target_size	recruitment_status	url	study_type	study_design	phase	hc_freetext	i_freetext	results_actual_enrolment	results_date_completed	results_url_link	results_summary	results_date_posted	results_date_first_publication	results_baseline_char	results_participant_flow	results_adverse_events	results_outcome_measures	results_url_protocol	results_IPD_plan	results_IPD_description	type	firstname	middlename	lastname	address	city	country1	zip	telephone	email	affiliation	country2	inclusion_criteria	agemin	agemax	gender	exclusion_criteria	hc_code
ChiCTR2200065198		ChiCTR	2022-10-31	Ma 'anshan People's Hospital, Anhui Province, China	To observe the effect of esketamine on postoperative depression in patients undergoing radical resection of cervical cancer based on micro RNA regulation		Anesthesiology、pathergasiology		2022-11-01		SK1 group:30;SK2 group:30;S1 group:30;	Pending	https://www.chictr.org.cn/showproj.html?proj=178543	Interventional study	Parallel	0	cervical cancer	SK1 group:esketamine（0.25 mg/kg）was injected intravenously at 30 minutes after the surgery started;SK2 group:esketamine（0.5 mg/kg）was injected intravenously at 30 minutes after the surgery started;S1 group:An equal volume of saline was injected intravenously at 30 minutes after the surgery started;														Scientific	Li Xin			45 Hubei Road, Huashan District, Maanshan, Anhui				+86 182 9823 1516	522400309@qq.com	Department of Anesthesiology, Ma 'anshan People's Hospital, Anhui	China	1. female aged 30-60 years; 2. it meets the American Society of Anesthesiologists classification ASA Ⅰ~Ⅱ; 3. body mass index < 30kg/m2; 4. the liver and kidney functions were normal before operation; 5. can communicate with testers normally; 6. preoperative Mini Mental State Examination (MMSE)>27 points; 7. obtain the patient's approval and volunteer to participate, and the patient signs the info…	40	60	Female	1. patients with severe cardiovascular and cerebrovascular diseases and severe hypertension; 2. patients with preoperative mental disorders [including preoperative Zung Depression Scale (SDS) score>=50], preoperative anxiety scale (SAS)>=50, visual or sensory disorders; Language impairment or severe hearing impairment; 3. increased intracranial pressure and intraocular pressure; 4. long term or r…
ChiCTR2200065198		ChiCTR	2022-10-31	Ma 'anshan People's Hospital, Anhui Province, China	To observe the effect of esketamine on postoperative depression in patients undergoing radical resection of cervical cancer based on micro RNA regulation		Anesthesiology、pathergasiology		2022-11-01		SK1 group:30;SK2 group:30;S1 group:30;	Pending	https://www.chictr.org.cn/showproj.html?proj=178543	Interventional study	Parallel	0	cervical cancer	SK1 group:esketamine（0.25 mg/kg）was injected intravenously at 30 minutes after the surgery started;SK2 group:esketamine（0.5 mg/kg）was injected intravenously at 30 minutes after the surgery started;S1 group:An equal volume of saline was injected intravenously at 30 minutes after the surgery started;														Public	Jing Jun			45 Hubei Road, Huashan District, Maanshan, Anhui				+86 139 6537 8174	ekinglang1983@163.com	Department of Anesthesiology, Ma 'anshan People's Hospital, Anhui	China	1. female aged 30-60 years; 2. it meets the American Society of Anesthesiologists classification ASA Ⅰ~Ⅱ; 3. body mass index < 30kg/m2; 4. the liver and kidney functions were normal before operation; 5. can communicate with testers normally; 6. preoperative Mini Mental State Examination (MMSE)>27 points; 7. obtain the patient's approval and volunteer to participate, and the patient signs the info…	40	60	Female	1. patients with severe cardiovascular and cerebrovascular diseases and severe hypertension; 2. patients with preoperative mental disorders [including preoperative Zung Depression Scale (SDS) score>=50], preoperative anxiety scale (SAS)>=50, visual or sensory disorders; Language impairment or severe hearing impairment; 3. increased intracranial pressure and intraocular pressure; 4. long term or r…
[truncated: 15 more columns]
